# Supplementary material for: Development and Implementation of Dried Blood Spot-based COVID-19 Serological Assays for Epidemiologic Studies
Source: bioRxiv or medRxiv preprint supplement (doi:10.1101/2021.11.25.21266786), 2021-11-28
Supplement: Supplementary file [file media-1.pdf]

Figure S1

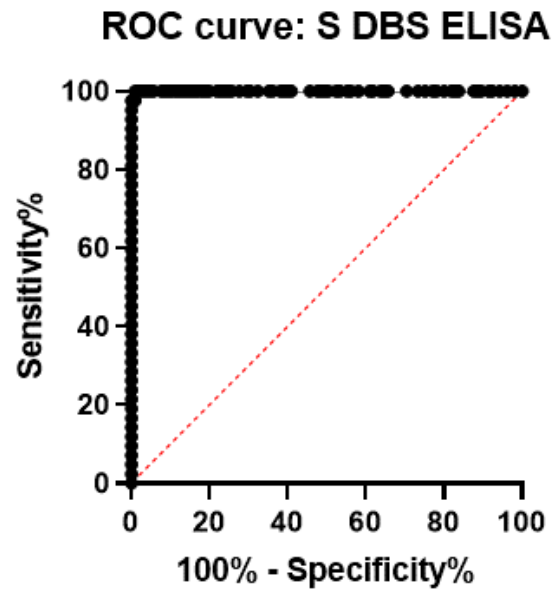

**Supplemental Figure 1.** Receiver-Operator Curve (ROC) of the validation of the anti-S IgG DBS ELISA.

Figure S2

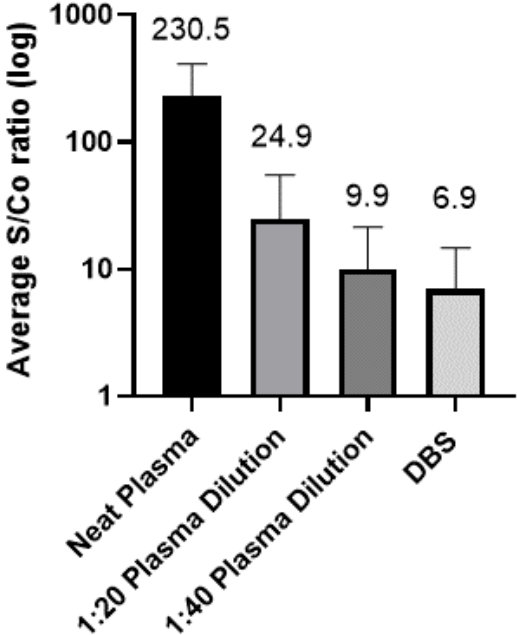

**Supplemental Figure 2.** Comparison of diluted plasma to DBS on the Ortho COV2T assay. Paired plasma-DBS samples (n=37) were tested undiluted or at the indicated dilutions of plasma. Numbers indicate the average S/Co ratio; error bars represent standard deviation.

Figure S3

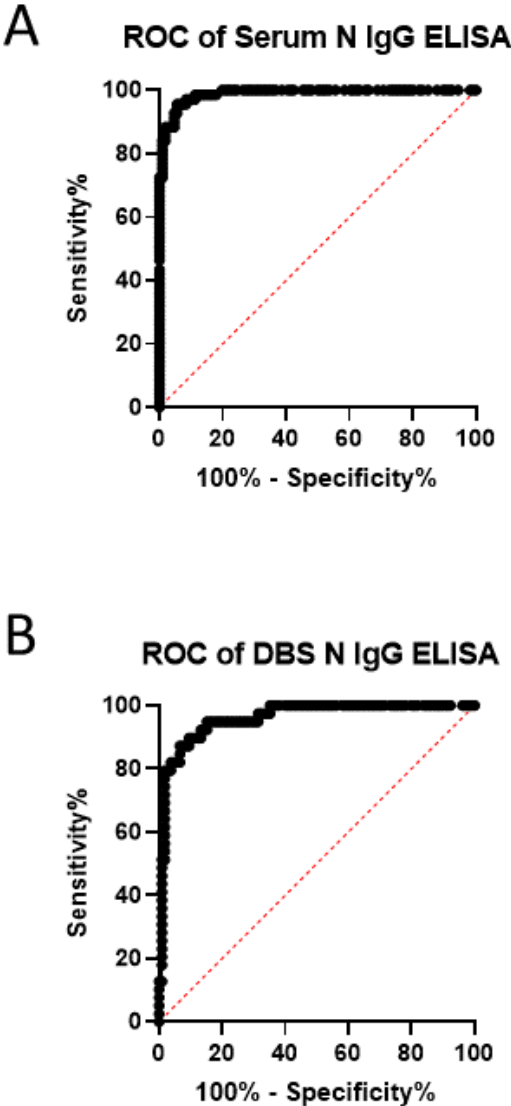

**Supplemental Figure 3.** Receiver-Operator Curves (ROC) of the validation of (A) the anti-N IgG ELISA in serum or of (B) the anti-N DBS ELISA.

Figure S4

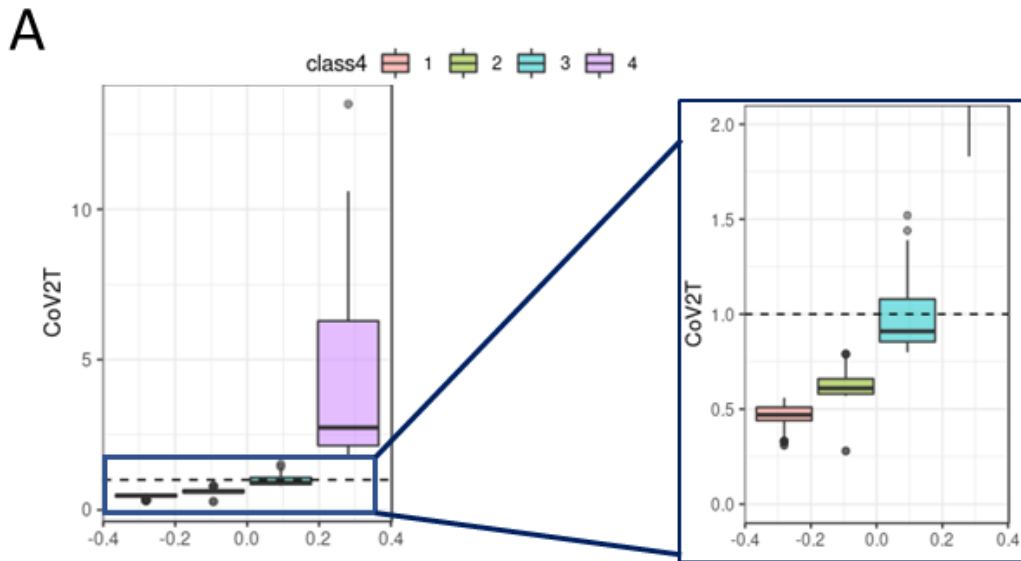

**B**

|         | N    | % of Total | Mean S/Co | SD     |
|---------|------|------------|-----------|--------|
| Class 1 | 3753 | 85.88%     | 0.472     | 0.0471 |
| Class 2 | 559  | 12.79%     | 0.626     | 0.0586 |
| Class 3 | 47   | 1.08%      | 0.997     | 0.195  |
| Class 4 | 11   | 0.25%      | 4.87      | 4.08   |
| Total   | 4370 | 100%       |           |        |

**Supplemental Figure 4.** (A) Ortho COV2T results from Round 1 of the EBCOVID study grouped into 4 categories. Right panel is an inset of the boxed area in the left panel. Dotted line represents the positivity cut-off value. (B) Descriptive table of data in (A). Highlighted row refers to results that fall within the indeterminate zone.
